# Supplementary material
Source: Springer Nature journal article supplement (https://www.springermedizin.de/resource/supplementary/12961_2008_74_MOESM4_ESM.pdf/9571378)
Supplement: MOESM4 [file 9571378]

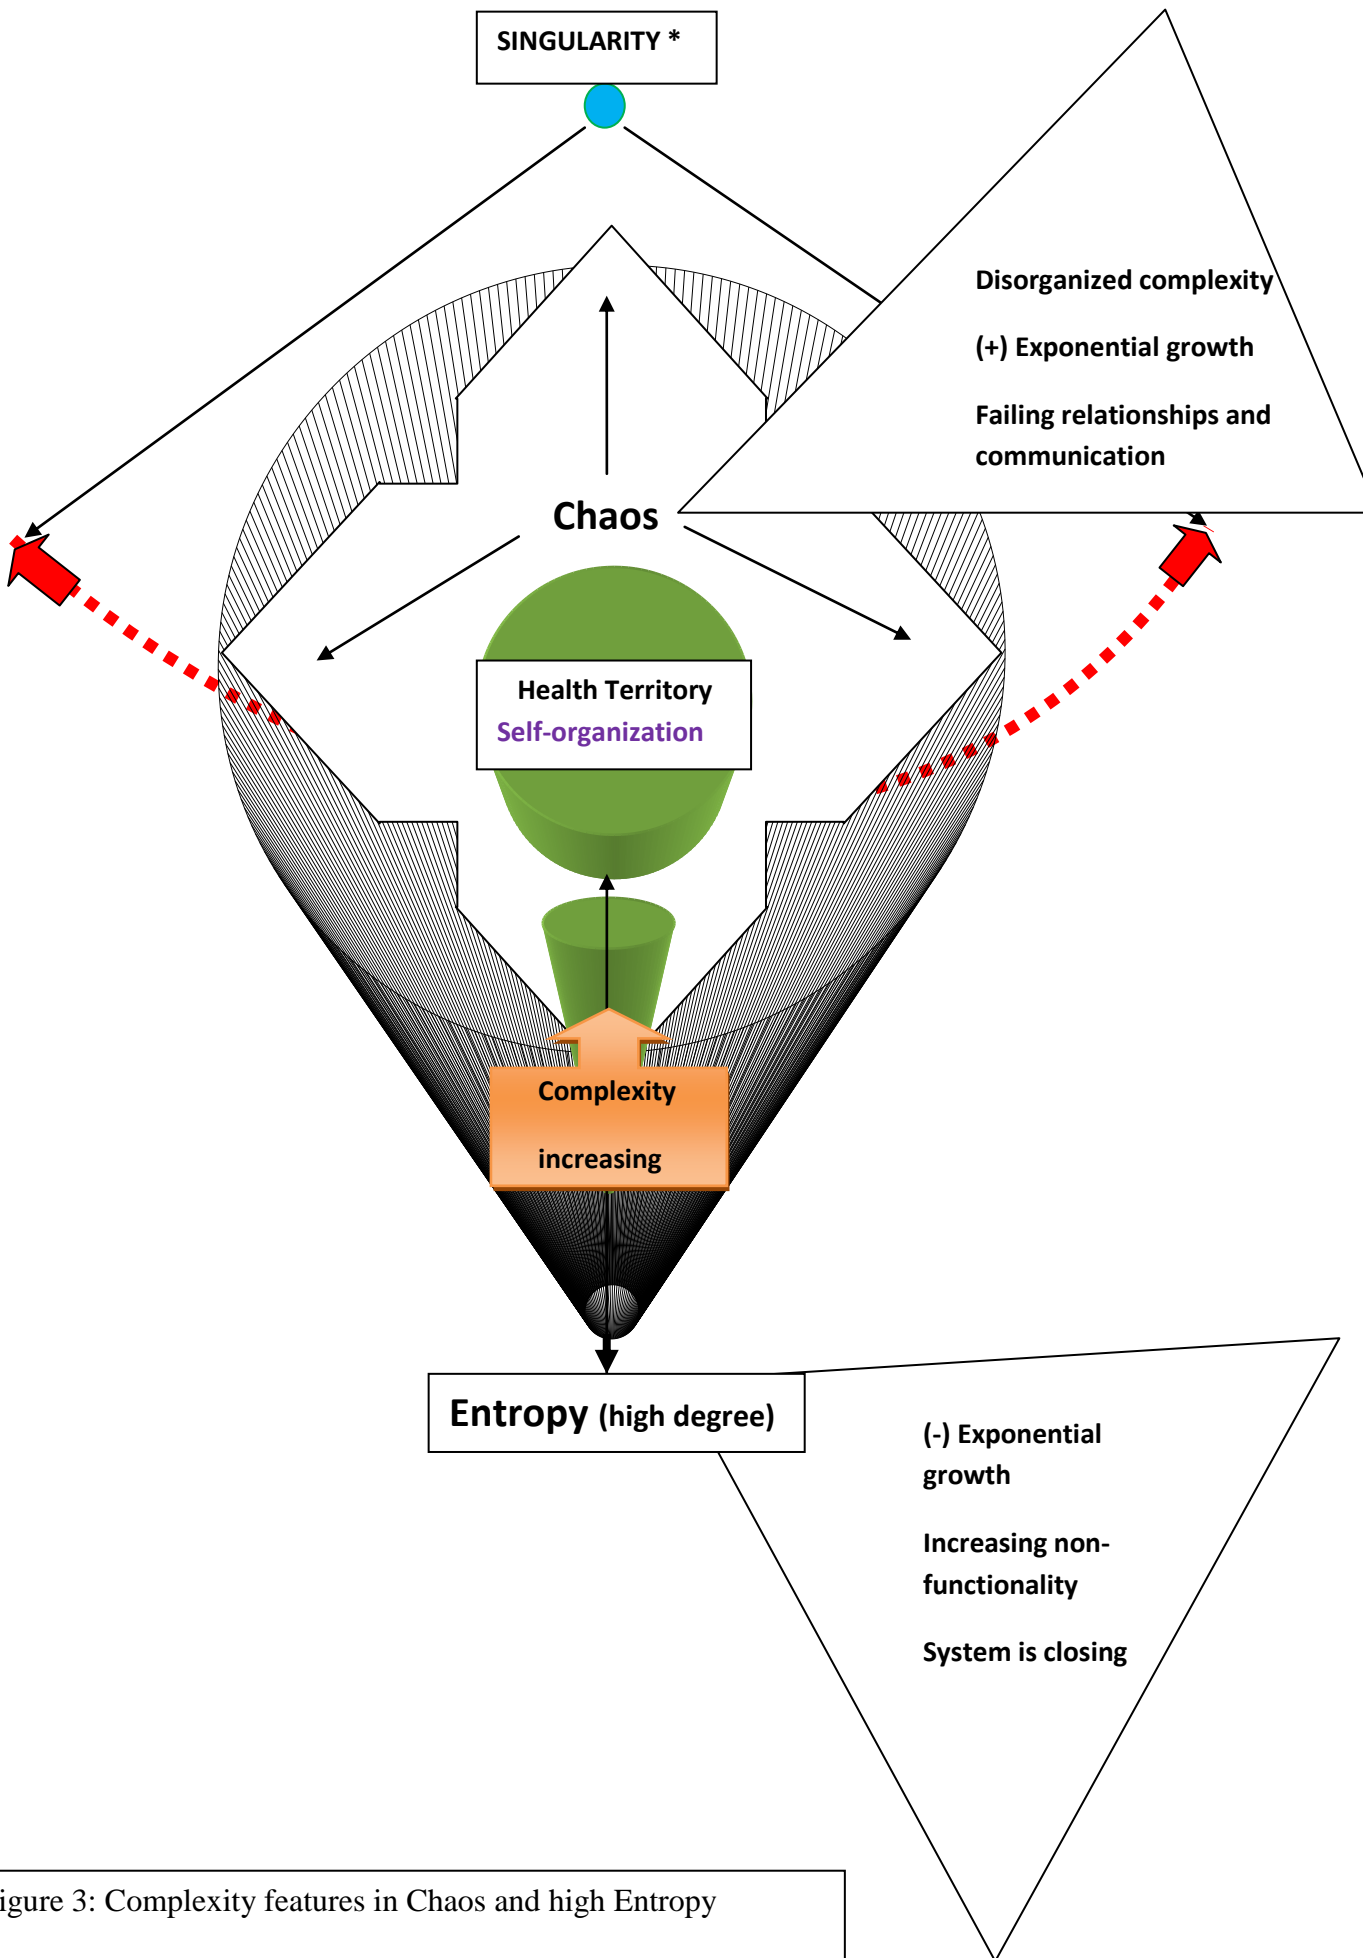

Figure 3: Complexity features in Chaos and high Entropy  
 \* a point where no pendulum/system oscillation exists
